# Supplementary material for: Introducing propensity score matching with progression rate matching (PSM-with-PRM): a novel method to better align uncontrolled extensions of randomized controlled trials data with external comparators
Source: Research Square preprint supplement (doi:10.21203/rs.3.rs-7133918/v1), 2025-08-21

**Title**:Introducing propensity score matching with progression rate matching (PSM-with-PRM): a novel method to better align uncontrolled extensions of randomized controlled trials data with external comparators

**Authors**: Basia Rogula1, Lauren Powell1, Melissa Beiner2, Michele Potashman2, Vlad Coric2, Victoria Wirtz2, Gil L’Italien2

**Affiliations:**

1 Broadstreet Health Economics and Outcomes Research, 300-177 W 7th, Vancouver BC, Canada

2 Biohaven Pharmaceuticals, Inc 215 Church St, New Haven CT, USA

**Corresponding author:**

Lauren Powell

300 - 177 W 7th Ave

Vancouver, BC, Canada

V5Y 1L8

lpowell@broadstreetheor.com

**Target journal**: BMC Medical Research Methodology

**Running title (max 45 characters):** PROGRESSION RATE MATCHING OF EXTERNAL CONTROLS

**Title character count:** 25 words

**Abstract word count:** 349 words

**Manuscript word count**: 2,637 (excluding abstract, legends, and references)

**Number of tables and figures**: 3 figures, 4 tables

**Number of references**: 26

**Keywords:** progression rate matching, external comparator, indirect treatment comparison, open-label extension, propensity score matching, unmeasured confounding, natural history comparator, negative control, post-hoc analysis, real-world evidence

**Author contributions:**

GLI, MB, VW, MP, and VC provided supervision, project administration, conceptualization, data curation, review and editing of the manuscript.

BR and LP contributed to conceptualization, data curation, analysis, drafting, review, and editing of the manuscript.

**Funding sources:** This study was funded by Biohaven Pharmaceuticals, Ltd.

**Disclosures:**

GLI, MB, VW, MP, and VC are employees and stockholders of Biohaven Pharmaceuticals, Inc.

BR and LP are employees of Broadstreet Health Economics and Outcomes Research, which received funding from Biohaven for conduct of this work.

**Data availability statement:**

To preserve participants privacy, raw data for the natural history and troriluzole datasets are not publicly available. Researchers can submit requests for the CRC-SCA data at https://www.ataxia.org/crc-sca/academic-research/ and EUROSCA data at https://www.eurosca.org.

Additional Supplemental Material

# CRC-SCA and EUROSCA descriptions

## CRC-SCA

The first data source informing the NatHx cohort is the CRC-SCA data set.25 CRC-SCA is a NH study with the primary objective of assessing disease progression in individuals with SCA 1, 2, 3, 6, 7, 8, and 10, using a number of validated neurological rating scales and timed performance measures.

Approximately 1000 participants were recruited across 13 centers in the US and followed annually for as long as they were willing to participate. Evaluations were conducted in 12-month intervals. Outcomes collected included the SARA, along with various other functional assessments, patient reported outcome measures, and clinical measures.

The patient data used in this study spans from 2010 to 2024.

## EUROSCA

The second data source informing the NatHx cohort comprises subjects from the EUROSCA clinical group, as described by Jacobi et al in two publications.25,26 The EUROSCA NH study is a European multicenter longitudinal cohort study initiated in 2005 to study patients with SCA genotypes 1, 2, 3, and 6. It was initiated with the goal to understand the SCA NH of disease and identify prognostic factors. The SARA scale is utilized in this NH study and a number of other outcomes are collected as well, such as the Inventory of Non-Ataxia Signs (INAS), quality of life (QoL) assessment with the EQ-5D and the Clinician Global Impression of Change (CGI-C).

The patient data used in this study spans from 2005 to 2009.

# Mapping SARA to f-SARA

**Supplemental Table 1.** Mapping of Scores from SARA to f-SARA

| SARAa | f-SARAb |
| --- | --- |
| **GAIT** | |
| 0, 1 | 0 |
| 2, 3 | 1 |
| 4, 5 | 2 |
| 6 | 3 |
| 7, 8 | 4 |
| **STANCE** | |
| 0, 1 | 0 |
| 2 | 1 |
| 3 | 2 |
| 4 | 3 |
| 5, 6 | 4 |
| **SITTING** | |
| 0 | 0 |
| 1 | 1 |
| 2 | 2 |
| 3 | 3 |
| 4 | 4 |
| **SPEECH** | |
| 0, 1 | 0 |
| 2 | 1 |
| 3 | 2 |
| 4 | 3 |
| 5, 6 | 4 |

Abbreviations: f-SARA, Modified functional Scale for The Assessment and Rating of Ataxia; SARA, Scale for the Assessment and Rating of Ataxia.

a The original response categories of the axial SARA items were gait (0-8), stance (0-6), sitting (0-4), speech disturbance (0-6).

Supplemental Figure 1. Negative control analyses

Figure 1 Change from baseline in f-SARA score at Year 1: placebo group (BHV4157-206) vs NatHx cohort


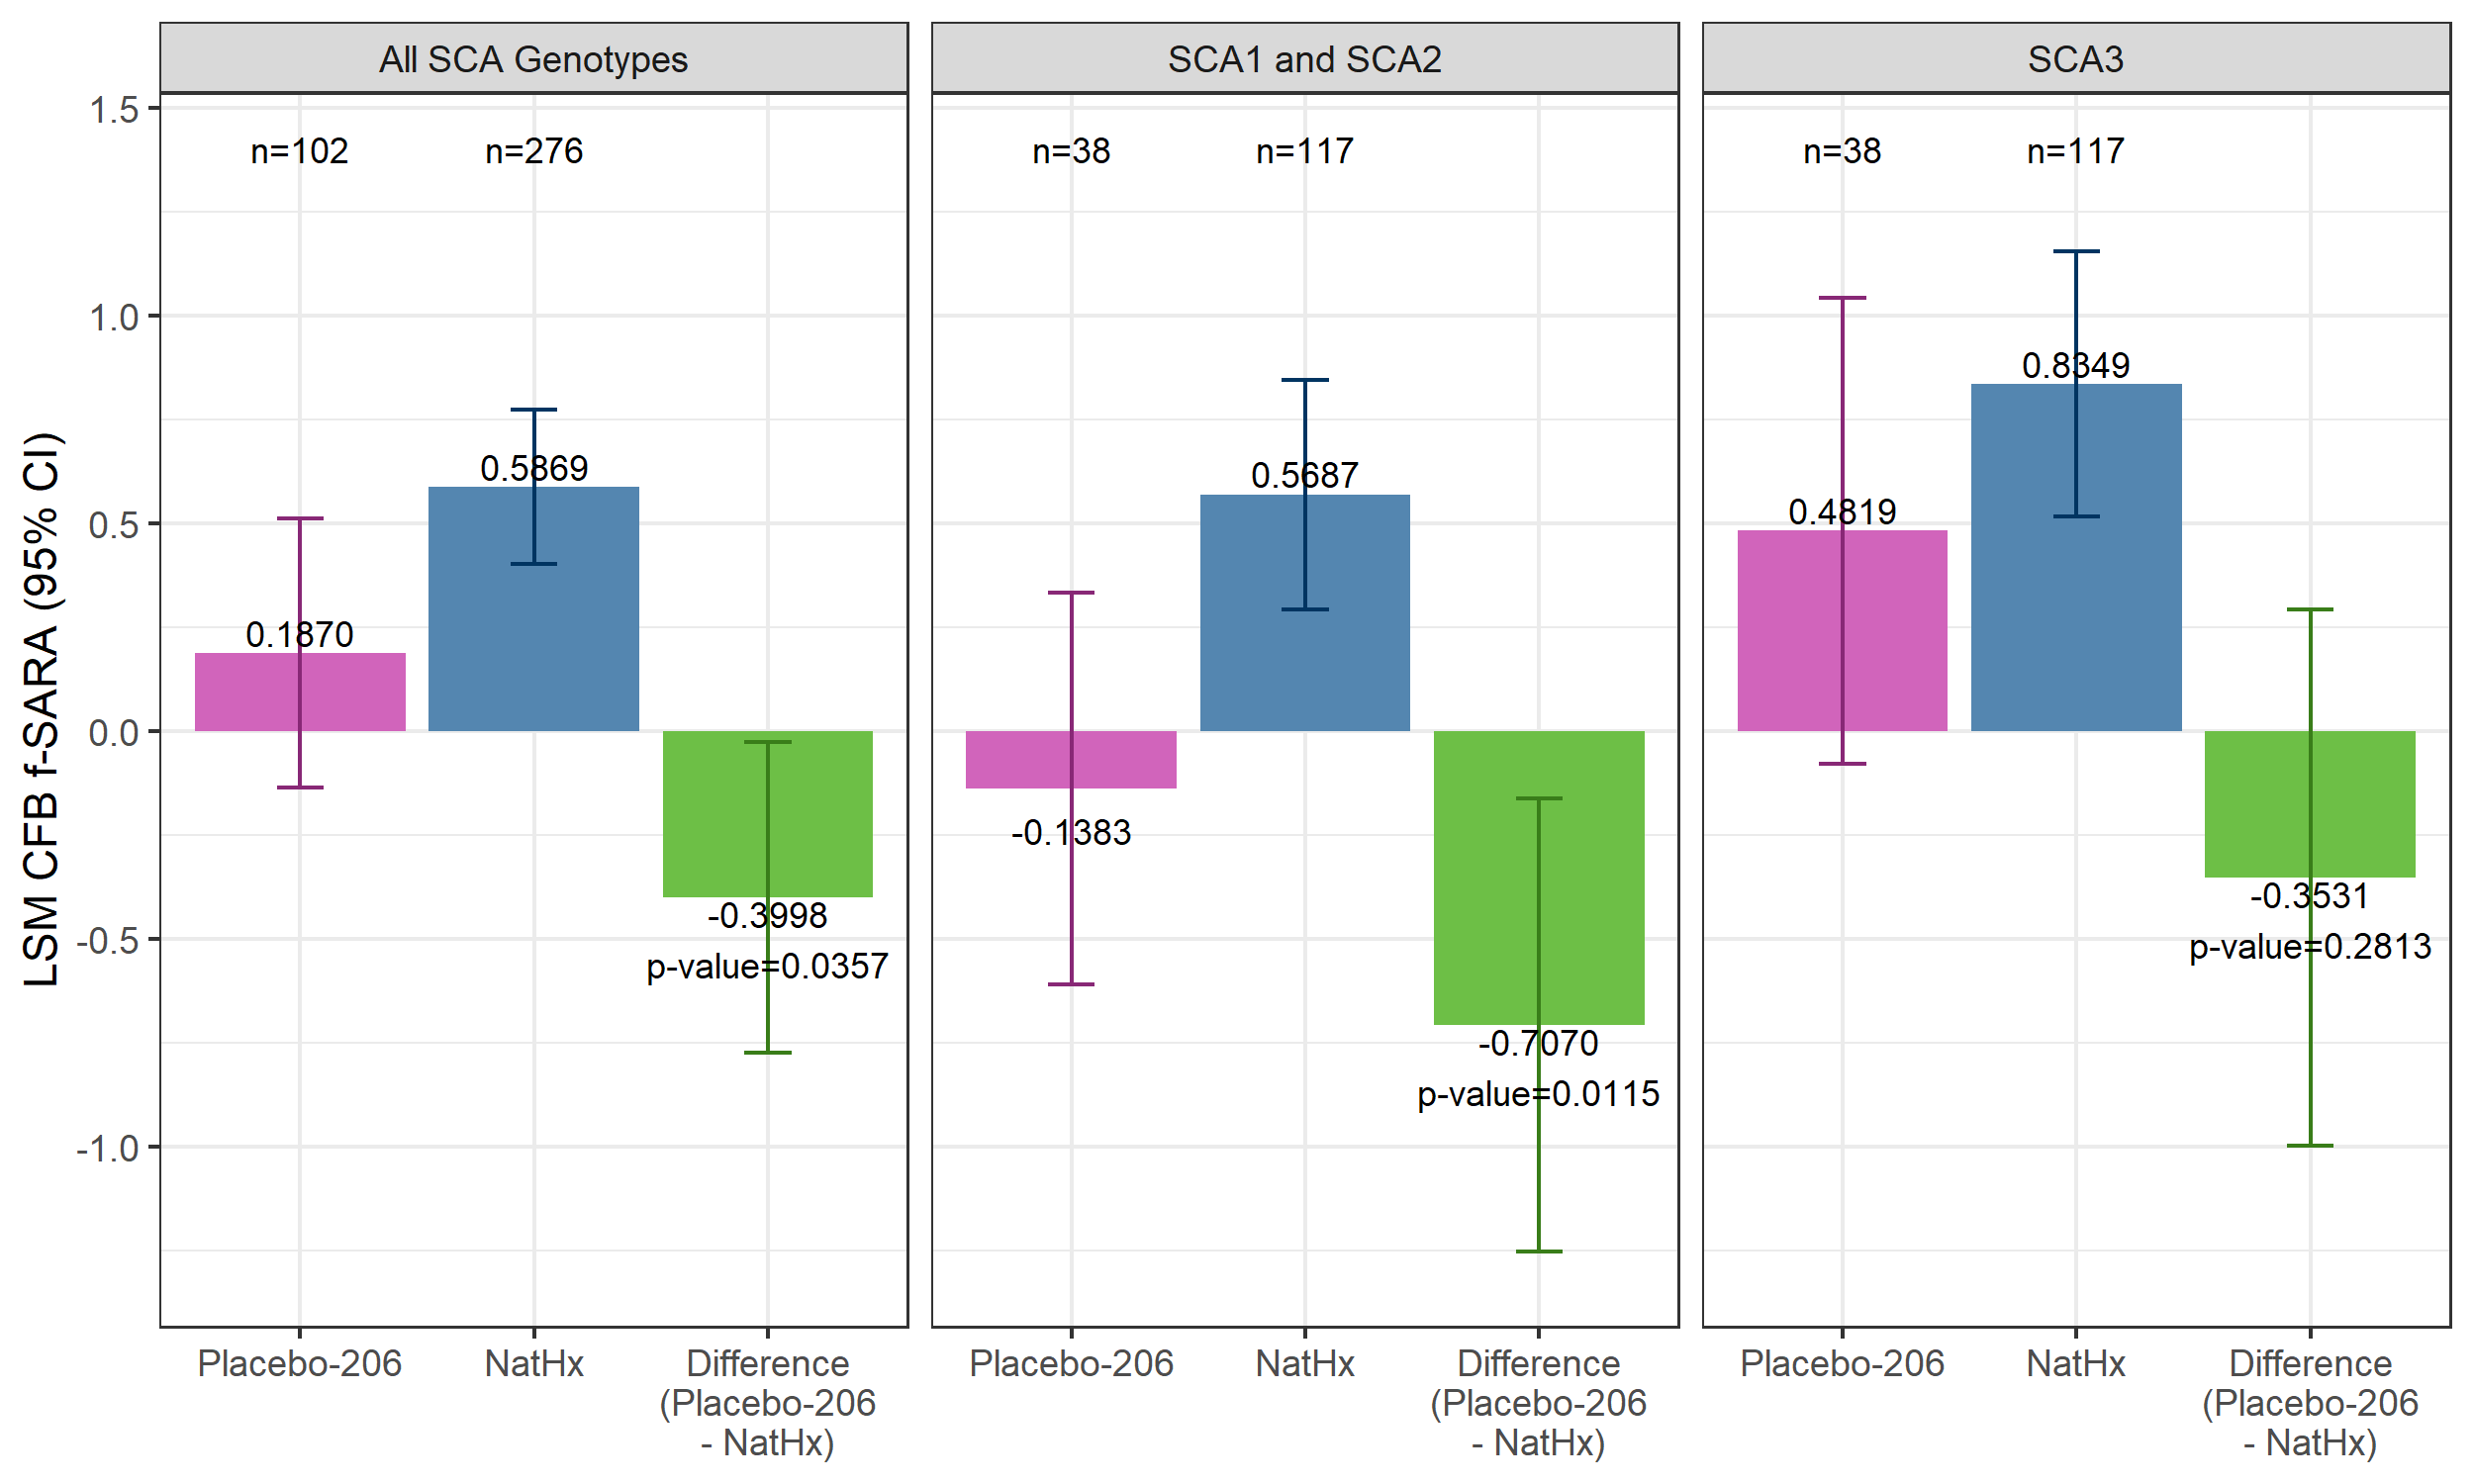

Supplement: Supplementary file 1 [file f761ac0484ef4a679d4077d9.docx]
